# Supplementary material for: Protein Phosphatase 2A in the Regulation of Wnt Signaling, Stem Cells, and Cancer
Source: PubMed Central journal article supplement (PMC5867842; doi:10.3390/genes9030121), 2018-02-26

**Table S1.** Mutations identified in protein phosphatase 2A (PP2A) scaffolding subunits.

| Subunit (Gene)                                  | Tumor Type                        | Frequency                                    | Mutation                                                            | Functional Consequence                                                                                  |
|-------------------------------------------------|-----------------------------------|----------------------------------------------|---------------------------------------------------------------------|---------------------------------------------------------------------------------------------------------|
| <b>A<math>\alpha</math></b><br><b>(PPP2R1A)</b> | Melanoma [1]                      | 1/14 (7%)                                    | Arg-418-Trp                                                         | Defective binding to A and/or c subunits [2]. Decreased B regulatory subunit and $\alpha$ stability [3] |
|                                                 | Lung Cancer [1]                   | 1/16 (6%)                                    | Glu-64-Asp                                                          |                                                                                                         |
|                                                 | Breast Cancer [1]                 | 2/43 (7%)                                    | Glu-64-Gly                                                          | Decreased expression                                                                                    |
|                                                 | MCF-7 breast cancer cell line [4] |                                              | Frameshift at AA170                                                 |                                                                                                         |
|                                                 | Gliomas [5]                       | 25/58 (43%)                                  |                                                                     |                                                                                                         |
|                                                 | Ovarian cancer [6]                | 3/42 (7%)                                    | Arg-183-Gly<br>Arg-183-Trp<br>Arg-182-Trp                           | Mutations predicted to impair subunit binding                                                           |
| <b>A<math>\beta</math></b><br><b>(PPP2R1B)</b>  | Lung Cancer [1]                   | 2/16 (13%)                                   | Exon 9 deletion                                                     |                                                                                                         |
|                                                 | Breast Cancer [1]                 | 4/43 (9%)                                    | Exon deletion/abnormal splicing                                     |                                                                                                         |
|                                                 | Colorectal Cancers                | 4/30 (13%) [7]                               | Glyc-15-Ala & Leu-499-Iso Val-498-Glu<br>Val-500-Gly<br>Ser-365-Pro | Mutations predicted to impair subunit binding                                                           |
|                                                 |                                   | 2/13 (15%) [8]                               |                                                                     |                                                                                                         |
|                                                 |                                   | 5/50 (10%) [9]                               | Missense: 4/50 (8%)<br>Homozygous deletions: 1/50 (2%)              |                                                                                                         |
|                                                 | Lung Cancer [8]                   | 5/33 (15%) – Primary<br>4/70 (6%) cell lines | Deletions, frameshifts, and point mutations                         | Decreased affinity for PP2Ac                                                                            |

## References

- Calin, G.A.; di Iasio, M.G.; Caprini, E.; Vorechovsky, I.; Natali, P.G.; Sozzi, G.; Croce, C.M.; Barbanti-Brodano, G.; Russo, G.; Negrini, M. Low frequency of alterations of the alpha (PPP2R1A) and beta (PPP2R1B) isoforms of the subunit a of the serine-threonine phosphatase 2A in human neoplasms. *Oncogene* **2000**, *19*, 1191–1195.
- Ruediger, R.; Pham, H.T.; Walter, G. Disruption of protein phosphatase 2A subunit interaction in human cancers with mutations in the A  $\alpha$  subunit gene. *Oncogene* **2001**, *20*, 10–15.
- Chen, W.; Arroyo, J.D.; Timmons, J.C.; Possemato, R.; Hahn, W.C. Cancer-associated PP2A  $\alpha$  subunits induce functional haploinsufficiency and tumorigenicity. *Cancer Res.* **2005**, *65*, 8183–8192.
- Suzuki, K.; Takahashi, K. Reduced expression of the regulatory A subunit of serine/threonine protein phosphatase 2A in human breast cancer MCF-7 cells. *Int. J. Oncol* **2003**, *23*, 1263–1268.
- Colella, S.; Ohgaki, H.; Ruediger, R.; Yang, F.; Nakamura, M.; Fujisawa, H.; Kleihues, P.; Walter, G. Reduced expression of the A $\alpha$  subunit of protein phosphatase 2A in human gliomas in the absence of mutations in the A $\alpha$  and A $\beta$  subunit genes. *Int. J. Cancer* **2001**, *93*, 798–804.
- Jones, S.; Wang, T.L.; Shih Ie, M.; Mao, T.L.; Nakayama, K.; Roden, R.; Glas, R.; Slamon, D.; Diaz, L.A., Jr.; Vogelstein, B., et al. Frequent mutations of chromatin remodeling gene *ARID1A* in ovarian clear cell carcinoma. *Science* **2010**, *330*, 228–231.
- Takagi, Y.; Futamura, M.; Yamaguchi, K.; Aoki, S.; Takahashi, T.; Saji, S. Alterations of the *PPP2R1B* gene located at 11q23 in human colorectal cancers. *Gut* **2000**, *47*, 268–271.
- Wang, S.S.; Esplin, E.D.; Li, J.L.; Huang, L.; Gazdar, A.; Minna, J.; Evans, G.A. Alterations of the *PPP2R1B* gene in human lung and colon cancer. *Science* **1998**, *282*, 284–287.
- Tamaki, M.; Goi, T.; Hirono, Y.; Katayama, K.; Yamaguchi, A. *PPP2R1B* gene alterations inhibit interaction of PP2A-Abeta and PP2A-c proteins in colorectal cancers. *Oncol. Rep.* **2004**, *11*, 655–659.

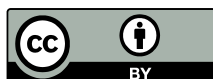

Supplement: genes-09-00121-s001.pdf [file genes-09-00121-s001.pdf]
